# Supplementary material for: Transcriptome analysis reveals the protective role of fructo-oligosaccharide in colonic mucosal barriers in exercise-induced stressed mice
Source: Royal Society of Chemistry journal article supplement (doi:10.1039/d0fo02556a), 2021-01-01
Supplement: d0fo02556a1.pdf [file d0fo02556a1.pdf]

### Supporting Information

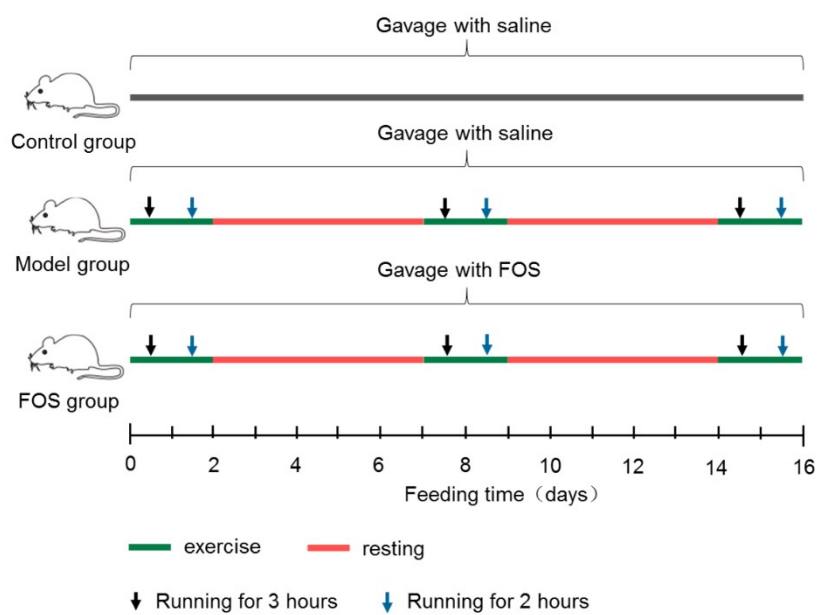

**Fig. S1** Schematic illustration of the exercise protocol and feeding strategies.

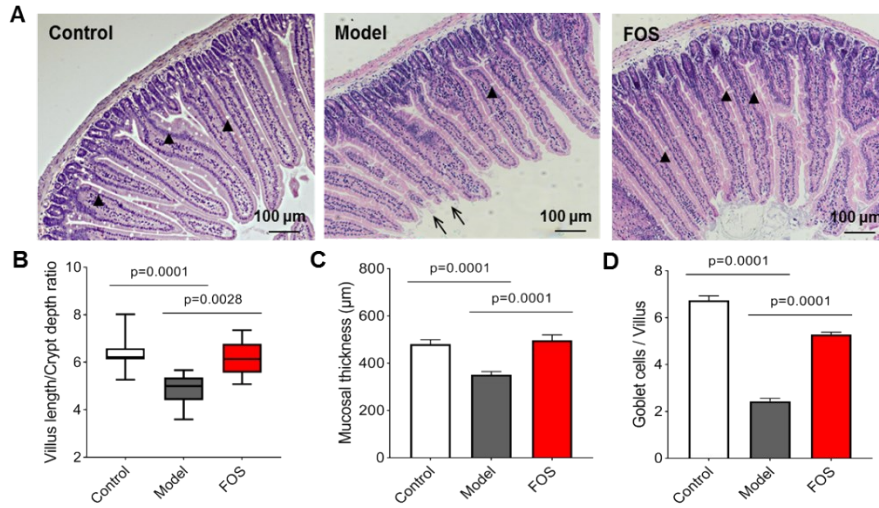

**Fig. S2** FOS improved small intestinal epithelium structure in mice under stress. (A) Histology. (B) Villus length/crypt depth ratio. (C) Mucosal thickness. (D) Goblet cells/villus. Data are means  $\pm$  SEM (n = 8). Statistical comparisons between two groups were performed using t-test. Note the presence of goblet cells ( $\blacktriangle$ ), which were distended by pale basophilic secretion. Note some villi with sloughed tips ( $\blacktriangledown$ ).

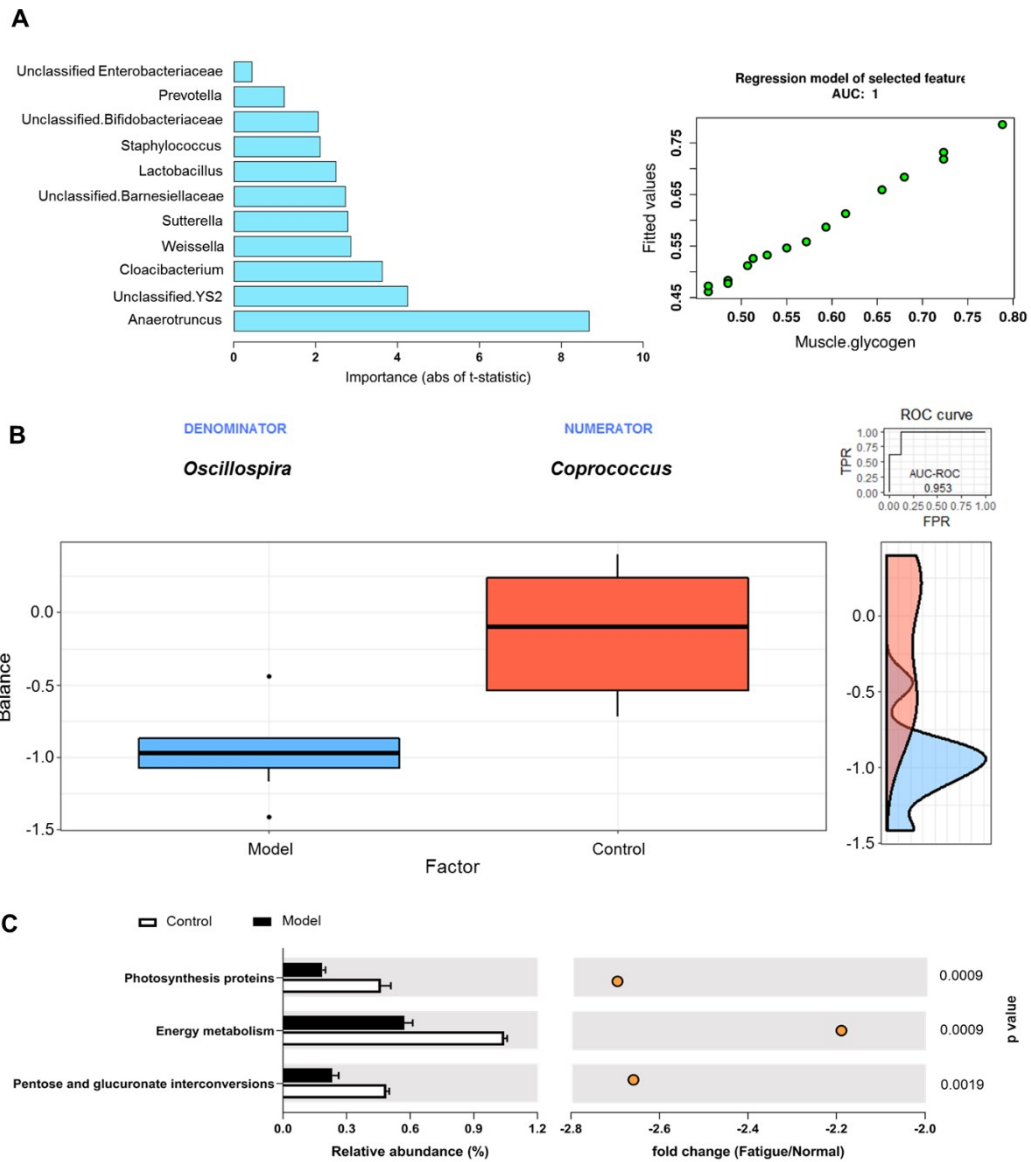

**Fig. S3** (A) LASSO regularized regression investigated the correlation of microbial communities and muscle glycogen levels between Control and Model groups. (B) Boxplot of the proposed balance scores to distinguish individuals from Control and Model groups. (C) Significantly different KEGG pathways between Control and Model groups that were identified with Wilcoxon test and ANCOM analysis ( $p < 0.05$ ).

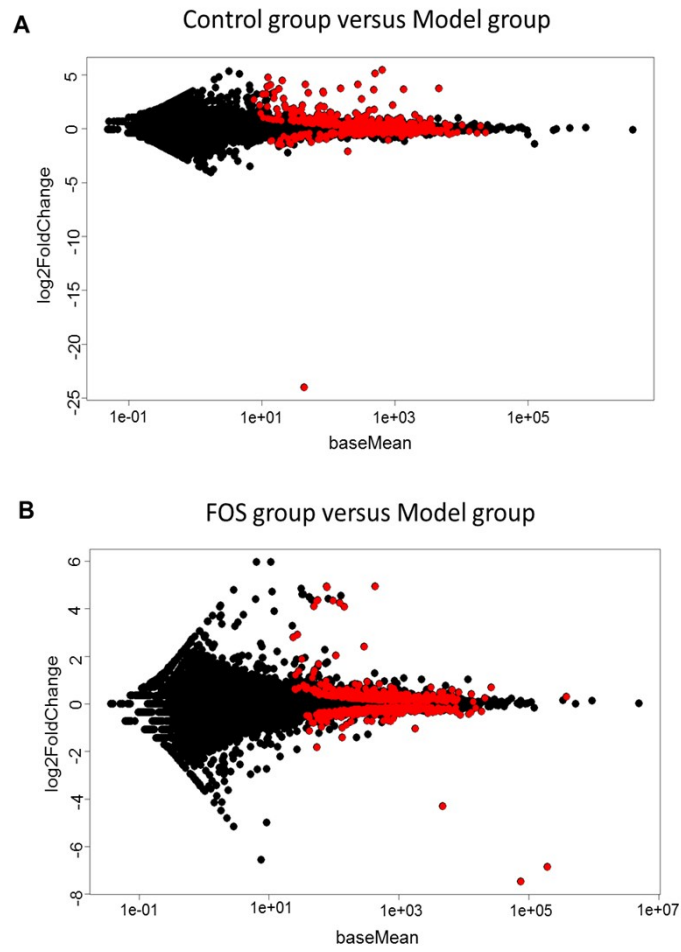

**Fig. S4** MAplot indicating differentially expressed genes (DEGs) (Red dots) and non- differentially expressed genes (Black dots).

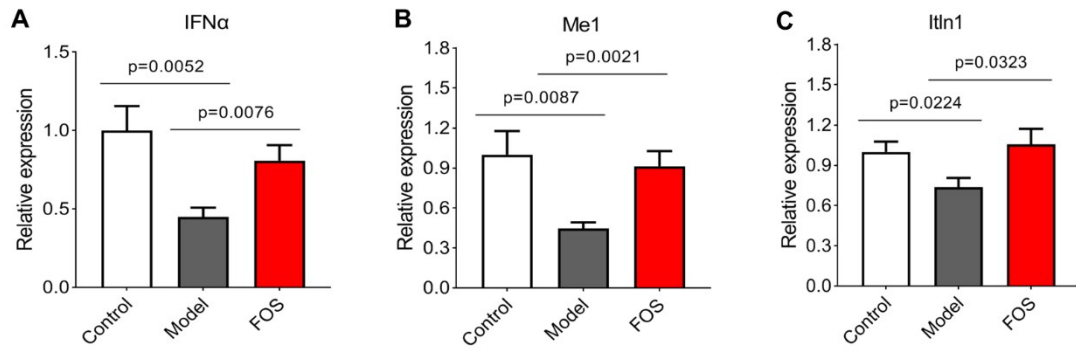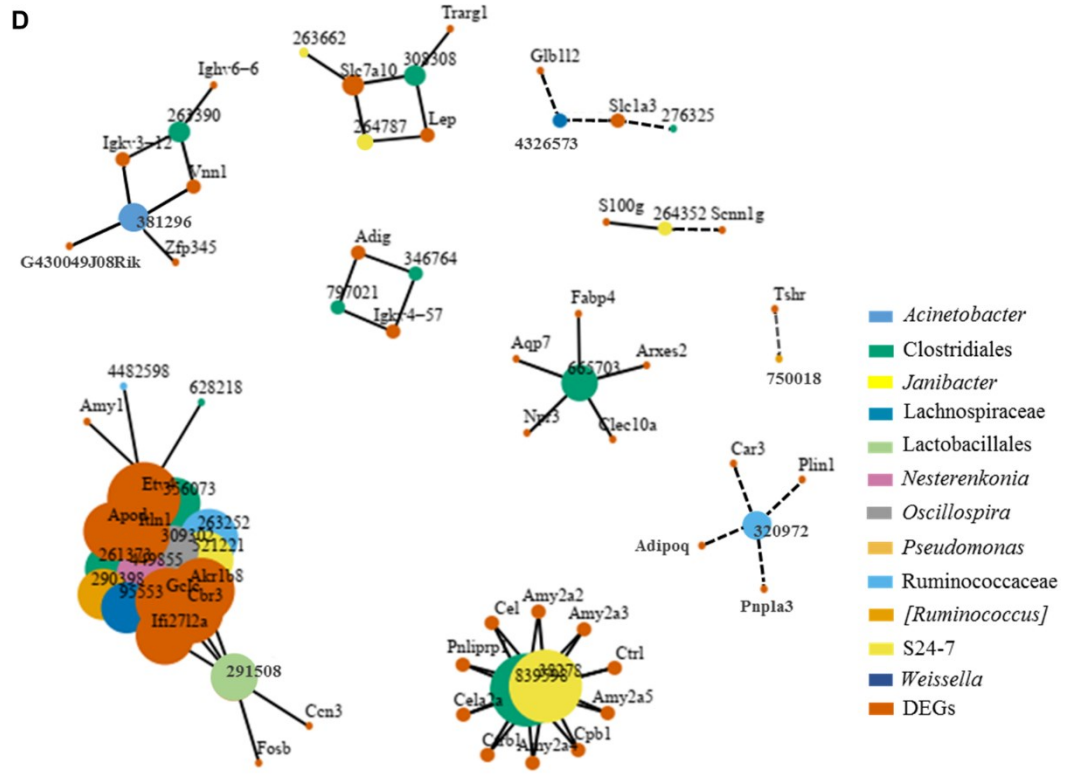

**Fig. S5** Relative mRNA expression of (A) IFN $\alpha$ , (B) Me1 and (C) Itln1. Data are means  $\pm$  SEM (n = 8). Statistical comparisons between two groups were performed using t-test. (D) Pearson's correlation ( $|r| > 0.8$  and  $p < 0.05$ ) between the expression of colonic genes and the abundance of gut microbiota in FOS group. Solid lines indicate positive correlations, while dashed lines indicate negative correlations.

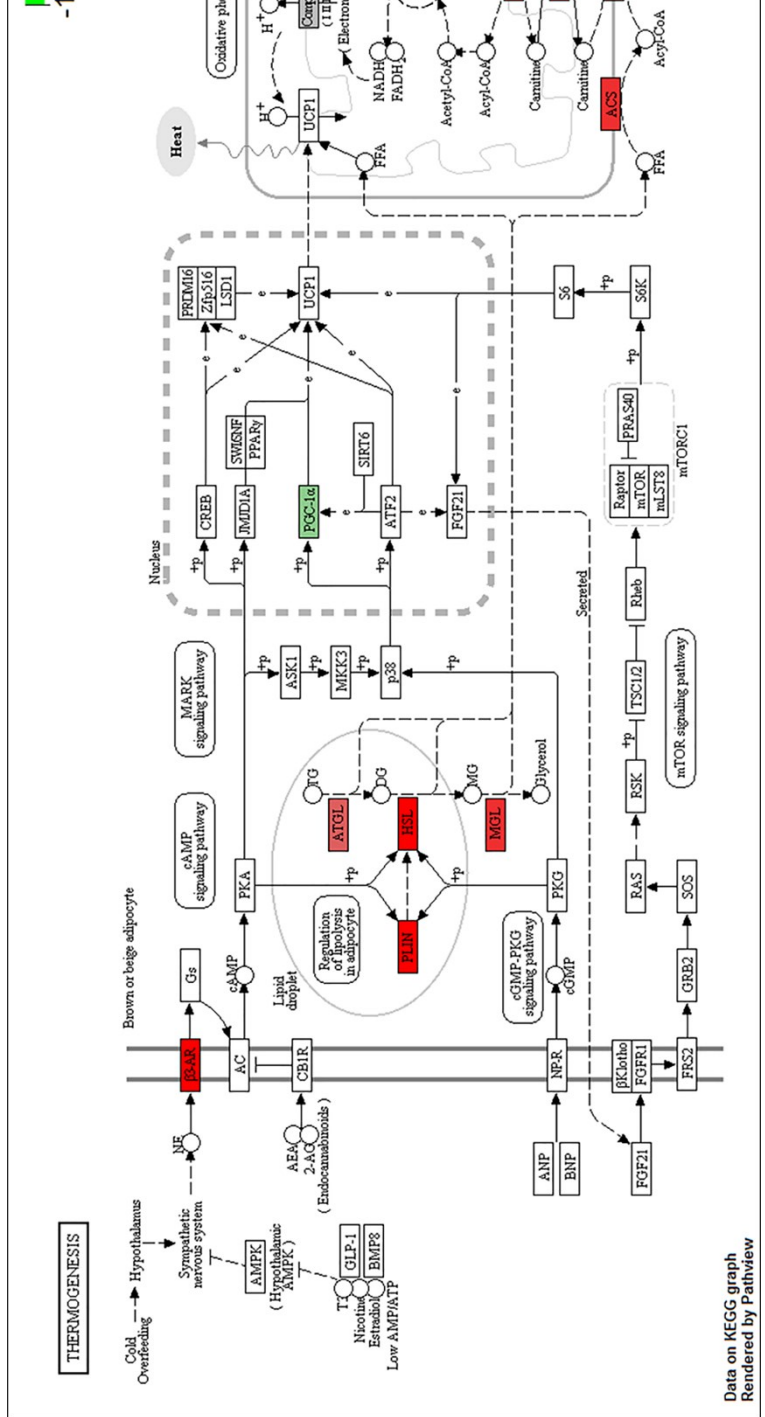

**Fig. S6** The pathview map of “Thermogenesis” according to KEGG enrichment results between Model and FOS groups.

**Fig. S7** The relative abundance of *Parabacteroides*. Data are means  $\pm$  SEM (n = 8).

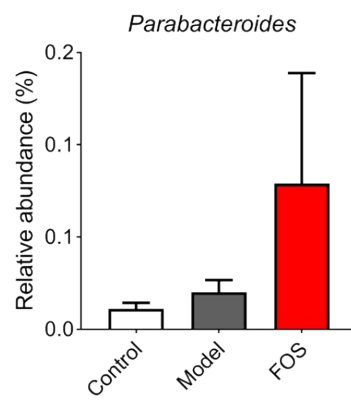



**Table S1** Primer sequences for RT-PCR amplification.

| Gene           | Forward (5'-3')            | Reverse (5'-3')            |
|----------------|----------------------------|----------------------------|
| Me1            | AATTCCTACGTGTTCCCTGG       | ATCCTAGCTGTTGCGTTACTG      |
| IFN $\alpha$   | GATGGATCCCTCCTAGACTCATTCTG | GGCTGTGTTTCTTCTCTCTCAGGAAC |
| Itln1          | CACGAAGAATGGTGTTCATC       | AGACCCAAAGGTGTTGTAG        |
| Occludin       | ACGGTGCCATAGAATGAGATGTTG   | CAGCTAGTTGTTTCATTTCTGCACC  |
| ZO-1           | GAGCAGGCTTTGGAGGAGAC       | AGCTGCTGAACAGCAAAAGC       |
| NLRP6          | AGCTGAGAACGCTGTGTCG        | AACTTGGGAACCCCGAAGC        |
| Muc2           | CACACAGCGGCCTTTCTCAT       | ACCCTCCTCCTACCACATTG       |
| IL-18          | ACTGTACAACCGCAGTAATACGG    | AGTGAACATTACAGATTTA        |
| $\beta$ -actin | CAGGCATTGCTGACAGGATG       | TGCTGATCCACATCTGCTGG       |

**Table S2** Significantly changed gut microbial enzymes between Control and Model groups according to ANCOM and Wilcoxon test.

| Taxa          | KEGG_Description                                                                            | p-values | Relative abundance |             | Related KEGG pathways                                                   |
|---------------|---------------------------------------------------------------------------------------------|----------|--------------------|-------------|-------------------------------------------------------------------------|
|               |                                                                                             |          | Model (%)          | Control (%) |                                                                         |
| <b>K04041</b> | fructose-1,6-bisphosphatase III [EC:3.1.3.11]                                               | 0.001    | 0.017±0.001        | 0.047±0.004 | ko00010 Glycolysis / Gluconeogenesis; ko00030 Pentose phosphate pathway |
| <b>K06152</b> | gluconate 2-dehydrogenase gamma chain [EC:1.1.1.99.3]                                       | 0.001    | 0.014±0.001        | 0.036±0.003 | ko00030 Pentose phosphate pathway                                       |
| K00925        | acetate kinase [EC:2.7.2.1]                                                                 | 0.003    | 0.116±0.002        | 0.082±0.004 | ko00620 Pyruvate metabolism                                             |
| K01835        | phosphoglucomutase [EC:5.4.2.2]                                                             | 0.003    | 0.097±0.005        | 0.063±0.004 | ko00010 Glycolysis / Gluconeogenesis; ko00030 Pentose phosphate pathway |
| K02110        | F-type H <sup>+</sup> -transporting ATPase subunit c                                        | 0.016    | 0.011±0.001        | 0.007±0.001 | ko00190 Oxidative phosphorylation                                       |
| K01693        | imidazoleglycerol-phosphate dehydratase [EC:4.2.1.19]                                       | 0.031    | 0.023±0.001        | 0.024±0.001 | ko00340 Histidine metabolism                                            |
| K00603        | glutamate formiminotransferase / 5-formyltetrahydrofolate cyclo-ligase [EC:2.1.2.5 6.3.3.2] | 0.035    | 0.026±0.003        | 0.035±0.004 | ko00341 Histidine metabolism                                            |
| K03498        | trk system potassium uptake protein                                                         | 0.04     | 0.128±0.004        | 0.141±0.006 |                                                                         |
| K02495        | oxygen-independent coproporphyrinogen III oxidase [EC:1.3.98.3]                             | 0.045    | 0.114±0.004        | 0.125±0.006 | ko00860 Porphyrin and chlorophyll metabolism                            |
| K00705        | 4-alpha-glucanotransferase [EC:2.4.1.25]                                                    | 0.046    | 0.163±0.016        | 0.110±0.008 | ko00500 Starch and sucrose metabolism                                   |
| K14155        | cysteine-S-conjugate beta-lyase [EC:4.4.1.13]                                               | 0.046    | 0.116±0.005        | 0.133±0.007 | ko00270 Cysteine and methionine metabolism                              |
| K09816        | zinc transport system permease protein                                                      | 0.046    | 0.069±0.003        | 0.079±0.005 | ko02010 ABC transporters                                                |

**Table S3** Significantly different expressed genes (DEGs) for colonic transcriptome (Control group versus Model group).

| GeneID             | FoldChange | pvalue | padj  | Symbol        | Name                                                                                                |
|--------------------|------------|--------|-------|---------------|-----------------------------------------------------------------------------------------------------|
| ENSMUSG00000094306 | 0.000      | 0.000  | 0.000 | Gm24924       | predicted gene,<br>24924                                                                            |
| ENSMUSG00000029816 | 0.228      | 0.000  | 0.020 | GpnmB         | glycoprotein<br>(transmembrane)<br>nmb<br>family with<br>sequence<br>similarity 220,<br>member A    |
| ENSMUSG00000083012 | 0.347      | 0.001  | 0.036 | Fam220a       | triggering receptor<br>expressed on<br>myeloid cells 2<br>CD300 molecule<br>like family<br>member B |
| ENSMUSG00000023992 | 0.369      | 0.001  | 0.024 | Trem2         | FBJ osteosarcoma<br>oncogene B                                                                      |
| ENSMUSG00000063193 | 0.373      | 0.001  | 0.027 | Cd300b        | apolipoprotein D                                                                                    |
| ENSMUSG00000003545 | 0.408      | 0.001  | 0.041 | Fosb          | hexokinase 3                                                                                        |
| ENSMUSG00000022548 | 0.413      | 0.000  | 0.000 | Apod          | dipeptidase 2                                                                                       |
| ENSMUSG00000025877 | 0.455      | 0.002  | 0.042 | Hk3           | C-type lectin                                                                                       |
| ENSMUSG00000053687 | 0.464      | 0.000  | 0.004 | Dpep2         | domain family 10,<br>member A<br>cellular                                                           |
| ENSMUSG00000000318 | 0.483      | 0.001  | 0.033 | Clec10a       | communication<br>network factor 3                                                                   |
| ENSMUSG00000037362 | 0.486      | 0.000  | 0.001 | Ccn3          | ets variant 4                                                                                       |
| ENSMUSG00000017724 | 0.4946     | 0.000  | 0.012 | Etv4          | peroxiredoxin like<br>2A                                                                            |
| ENSMUSG00000021792 | 2.003      | 0.000  | 0.000 | Prx12a        | RIKEN cDNA<br>F730043M19<br>gene                                                                    |
| ENSMUSG00000052125 | 2.025      | 0.001  | 0.041 | F730043M19Rik | RIKEN cDNA<br>G430049J08<br>gene                                                                    |
| ENSMUSG00000096528 | 2.088      | 0.000  | 0.000 | G430049J08Rik | transferrin<br>aldo-keto                                                                            |
| ENSMUSG00000032554 | 2.171      | 0.000  | 0.004 | Trf           | reductase family<br>1, member B8                                                                    |
| ENSMUSG00000029762 | 2.180      | 0.000  | 0.005 | Akr1b8        | neuronatin                                                                                          |
| ENSMUSG00000067786 | 2.341      | 0.000  | 0.001 | Nnat          | gasdermin C4                                                                                        |
| ENSMUSG00000055748 | 2.347      | 0.000  | 0.017 | Gsdmc4        | carbonyl                                                                                            |
| ENSMUSG00000022947 | 2.360      | 0.000  | 0.002 | Cbr3          |                                                                                                     |

|                     |       |       |       |          |                                                                                              |
|---------------------|-------|-------|-------|----------|----------------------------------------------------------------------------------------------|
| ENSMUSG00000021069  | 2.401 | 0.000 | 0.000 | Pygl     | reductase 3<br>liver glycogen<br>phosphorylase                                               |
| ENSMUSG00000032350  | 2.402 | 0.000 | 0.005 | Gclc     | glutamate-<br>cysteine ligase,<br>catalytic subunit                                          |
| ENSMUSG00000003123  | 2.416 | 0.000 | 0.000 | Lipe     | lipase, hormone<br>sensitive                                                                 |
| ENSMUSG000000094117 | 2.464 | 0.001 | 0.036 | Igkv3-12 | immunoglobulin<br>kappa variable 3-<br>12                                                    |
| ENSMUSG00000005360  | 2.474 | 0.000 | 0.000 | Slc1a3   | solute carrier<br>family 1 (glial<br>high affinity<br>glutamate<br>transporter),<br>member 3 |
| ENSMUSG00000029417  | 2.477 | 0.000 | 0.002 | Cxcl9    | chemokine (C-X-<br>C motif) ligand 9                                                         |
| ENSMUSG00000037440  | 2.487 | 0.000 | 0.000 | Vnn1     | vanin 1                                                                                      |
| ENSMUSG00000028427  | 2.633 | 0.000 | 0.000 | Aqp7     | aquaporin 7                                                                                  |
| ENSMUSG00000032418  | 2.708 | 0.000 | 0.000 | Me1      | malic enzyme 1,<br>NADP(+)-<br>dependent,<br>cytosolic                                       |
| ENSMUSG00000047182  | 2.728 | 0.000 | 0.020 | Irs3     | insulin receptor<br>substrate 3                                                              |
| ENSMUSG00000079017  | 2.737 | 0.000 | 0.000 | Ifi2712a | interferon, alpha-<br>inducible protein<br>27 like 2A                                        |
| ENSMUSG00000074195  | 2.843 | 0.000 | 0.011 | Clca4b   | chloride channel<br>accessory 4B<br>adipocyte-related                                        |
| ENSMUSG00000048040  | 3.082 | 0.000 | 0.000 | Arxes2   | X-chromosome<br>expressed<br>sequence 2                                                      |
| ENSMUSG00000038209  | 3.157 | 0.000 | 0.008 | Itln1    | intelectin 1<br>(galactofuranose<br>binding)                                                 |
| ENSMUSG00000040808  | 3.356 | 0.001 | 0.034 | S100g    | S100 calcium<br>binding protein G<br>trafficking                                             |
| ENSMUSG00000046275  | 3.386 | 0.000 | 0.000 | Trarg1   | regulator of<br>GLUT4                                                                        |

|                    |       |       |       |           |                     |
|--------------------|-------|-------|-------|-----------|---------------------|
|                    |       |       |       |           | (SLC2A4) 1          |
|                    |       |       |       |           | N-                  |
| ENSMUSG00000048142 | 3.419 | 0.000 | 0.000 | Nat8l     | acetyltransferase   |
|                    |       |       |       |           | 8-like              |
|                    |       |       |       |           | patatin-like        |
| ENSMUSG00000041653 | 3.510 | 0.000 | 0.005 | Pnpla3    | phospholipase       |
|                    |       |       |       |           | domain containing   |
|                    |       |       |       |           | 3                   |
| ENSMUSG00000031722 | 3.667 | 0.001 | 0.027 | Hp        | haptoglobin         |
|                    |       |       |       |           | carbonic            |
| ENSMUSG00000031373 | 3.765 | 0.000 | 0.000 | Car5b     | anhydrase 5b,       |
|                    |       |       |       |           | mitochondrial       |
|                    |       |       |       |           | tissue inhibitor of |
| ENSMUSG00000030317 | 3.776 | 0.000 | 0.000 | Timp4     | metalloproteinase   |
|                    |       |       |       |           | 4                   |
|                    |       |       |       |           | ATP-binding         |
| ENSMUSG00000055782 | 4.012 | 0.000 | 0.000 | Abcd2     | cassette, sub-      |
|                    |       |       |       |           | family D (ALD),     |
|                    |       |       |       |           | member 2            |
|                    |       |       |       |           | serine (or          |
|                    |       |       |       |           | cysteine)           |
| ENSMUSG00000066361 | 4.165 | 0.000 | 0.000 | Serpina3c | peptidase           |
|                    |       |       |       |           | inhibitor, clade A, |
|                    |       |       |       |           | member 3C           |
| ENSMUSG00000022206 | 4.271 | 0.000 | 0.001 | Npr3      | natriuretic peptide |
|                    |       |       |       |           | receptor 3          |
| ENSMUSG00000031489 | 4.424 | 0.000 | 0.000 | Adrb3     | adrenergic          |
|                    |       |       |       |           | receptor, beta 3    |
|                    |       |       |       |           | melanocortin 2      |
| ENSMUSG00000039956 | 4.453 | 0.001 | 0.022 | Mrap      | receptor accessory  |
|                    |       |       |       |           | protein             |
| ENSMUSG00000074264 | 4.463 | 0.000 | 0.000 | Amy1      | amylase 1,          |
|                    |       |       |       |           | salivary            |
|                    |       |       |       |           | fatty acid binding  |
| ENSMUSG00000062515 | 4.466 | 0.000 | 0.000 | Fabp4     | protein 4,          |
|                    |       |       |       |           | adipocyte           |
|                    |       |       |       |           | ankyrin repeat and  |
| ENSMUSG00000074771 | 6.532 | 0.000 | 0.000 | Ankef1    | EF-hand domain      |
|                    |       |       |       |           | containing 1        |
|                    |       |       |       |           | cell death-         |
| ENSMUSG00000030278 | 6.650 | 0.000 | 0.000 | Cidec     | inducing DFFA-      |
|                    |       |       |       |           | like effector c     |
|                    |       |       |       |           | solute carrier      |
| ENSMUSG00000020264 | 6.852 | 0.000 | 0.000 | Slc36a2   | family 36           |

|                    |        |       |       |               |                                                                                                      |
|--------------------|--------|-------|-------|---------------|------------------------------------------------------------------------------------------------------|
|                    |        |       |       |               | (proton/amino acid symporter), member 2                                                              |
| ENSMUSG00000040564 | 7.055  | 0.000 | 0.000 | Apoc1         | apolipoprotein C-I                                                                                   |
| ENSMUSG00000044405 | 9.226  | 0.000 | 0.000 | Adig          | adipogenin thyroid stimulating hormone receptor                                                      |
| ENSMUSG00000020963 | 9.384  | 0.000 | 0.000 | Tshr          |                                                                                                      |
| ENSMUSG00000030546 | 9.833  | 0.000 | 0.001 | Plin1         | perilipin 1                                                                                          |
| ENSMUSG00000036395 | 10.045 | 0.000 | 0.000 | Glb112        | galactosidase, beta 1-like 2                                                                         |
| ENSMUSG00000043122 | 10.267 | 0.000 | 0.000 | A530016L24Rik | RIKEN cDNA A530016L24 gene                                                                           |
| ENSMUSG00000035686 | 10.641 | 0.000 | 0.000 | Thrsp         | thyroid hormone responsive                                                                           |
| ENSMUSG00000005413 | 12.033 | 0.000 | 0.000 | Hmox1         | heme oxygenase 1                                                                                     |
| ENSMUSG00000027559 | 12.599 | 0.000 | 0.000 | Car3          | carbonic anhydrase 3 solute carrier family 7 (cationic amino acid transporter, y+ system), member 10 |
| ENSMUSG00000030495 | 12.672 | 0.000 | 0.000 | Slc7a10       |                                                                                                      |
| ENSMUSG00000037071 | 12.987 | 0.000 | 0.000 | Scd1          | stearoyl-Coenzyme A desaturase 1                                                                     |
| ENSMUSG00000078087 | 13.281 | 0.000 | 0.010 | Rps1211       | ribosomal protein S12-like 1                                                                         |
| ENSMUSG00000074268 | 14.780 | 0.000 | 0.020 | Amy2a5        | amylase 2a5                                                                                          |
| ENSMUSG00000093931 | 14.780 | 0.000 | 0.020 | Amy2a3        | amylase 2a3                                                                                          |
| ENSMUSG00000096569 | 14.780 | 0.000 | 0.020 | Amy2a2        | amylase 2a2                                                                                          |
| ENSMUSG00000096770 | 14.780 | 0.000 | 0.020 | Amy2a4        | amylase 2a4                                                                                          |
| ENSMUSG00000039196 | 16.377 | 0.000 | 0.000 | Orm1          | orosomuroid 1 adiponectin, C1Q and collagen domain containing                                        |
| ENSMUSG00000022878 | 16.878 | 0.000 | 0.000 | Adipoq        |                                                                                                      |
| ENSMUSG00000012705 | 17.042 | 0.000 | 0.000 | Retn          | resistin                                                                                             |
| ENSMUSG00000059201 | 21.707 | 0.000 | 0.029 | Lep           | leptin                                                                                               |
| ENSMUSG00000002588 | 26.790 | 0.000 | 0.000 | Pon1          | paraoxonase 1                                                                                        |
| ENSMUSG00000061780 | 34.820 | 0.000 | 0.000 | Cfd           | complement factor D (adipsin)                                                                        |
| ENSMUSG00000025479 | 43.444 | 0.000 | 0.000 | Cyp2e1        | cytochrome P450, family 2,                                                                           |

---

subfamily e,  
polypeptide 1

---

**Table S4** Significantly different expressed genes (DEGs) for colonic transcriptome (FOS group versus Model group).

| GeneID             | FoldChange | pvalue | padj  | Symbol     | Name                                     |
|--------------------|------------|--------|-------|------------|------------------------------------------|
| ENSMUSG00000035202 | 0.006      | 0.000  | 0.000 | Lars2      | leucyl-tRNA synthetase, mitochondrial    |
| ENSMUSG00000098178 | 0.009      | 0.000  | 0.000 | Gm42418    | predicted gene, 42418                    |
| ENSMUSG00000089855 | 0.051      | 0.000  | 0.000 |            |                                          |
| ENSMUSG00000065820 | 0.283      | 0.000  | 0.000 | Gm26316    | predicted gene, 26316                    |
| ENSMUSG00000065087 | 0.376      | 0.000  | 0.000 | Snord22    | small nucleolar RNA, C/D box 22          |
| ENSMUSG00000000216 | 0.455      | 0.002  | 0.037 | Scnn1g     | sodium channel, nonvoltage-gated 1 gamma |
| ENSMUSG00000019970 | 0.485      | 0.001  | 0.023 | Sgk1       | serum/glucocorticoid regulated kinase 1  |
| ENSMUSG00000044330 | 0.496      | 0.000  | 0.000 | Gm9790     | predicted gene 9790                      |
| ENSMUSG00000095865 | 2.148      | 0.002  | 0.037 | Gm13237    | predicted gene 13237                     |
| ENSMUSG00000095554 | 2.323      | 0.003  | 0.046 | Ighv1-16   | immunoglobulin heavy variable 1-16       |
| ENSMUSG00000076680 | 2.462      | 0.000  | 0.009 | Ighv6-6    | immunoglobulin heavy variable 6-6        |
| ENSMUSG00000097854 | 2.589      | 0.001  | 0.021 | Gm26602    | predicted gene, 26602                    |
| ENSMUSG00000074506 | 2.660      | 0.000  | 0.001 | Gm10705    | predicted gene 10705                     |
| ENSMUSG00000074731 | 3.188      | 0.000  | 0.000 | Zfp345     | zinc finger protein 345                  |
| ENSMUSG00000076556 | 3.683      | 0.000  | 0.000 | Igkv4-57   | immunoglobulin kappa variable 4-57       |
| ENSMUSG00000047370 | 4.104      | 0.000  | 0.004 | Gm7367     | predicted pseudogene 7367                |
| ENSMUSG00000005413 | 5.300      | 0.001  | 0.019 | Hmox1      | heme oxygenase 1                         |
| ENSMUSG00000031896 | 6.945      | 0.001  | 0.022 | Ctrl       | chymotrypsin-like ribosomal protein      |
| ENSMUSG00000067575 | 7.459      | 0.000  | 0.011 | Rpl35a-ps3 | L35A, pseudogene 3                       |
| ENSMUSG00000083424 | 7.459      | 0.000  | 0.011 | Rpl35a-ps4 | ribosomal protein 35A, pseudogene 4      |
| ENSMUSG00000094664 | 7.459      | 0.000  | 0.011 | Rpl35a-ps6 | ribosomal protein L35A, pseudogene 6     |
| ENSMUSG00000066724 | 16.795     | 0.001  | 0.026 | Gm10175    | predicted gene                           |



---

|                    |        |       |       |          |                                                    |
|--------------------|--------|-------|-------|----------|----------------------------------------------------|
|                    |        |       |       |          | 10175                                              |
| ENSMUSG00000042179 | 17.198 | 0.000 | 0.011 | Pnliprp1 | pancreatic lipase<br>related protein 1             |
| ENSMUSG00000031957 | 18.918 | 0.002 | 0.036 | Ctrb1    | chymotrypsinogen<br>B1                             |
| ENSMUSG00000058579 | 19.996 | 0.002 | 0.040 | Cela2a   | chymotrypsin-like<br>elastase family,<br>member 2A |
| ENSMUSG00000026818 | 20.356 | 0.000 | 0.011 | Cel      | carboxyl ester lipase                              |
| ENSMUSG00000011463 | 20.379 | 0.001 | 0.025 | Cpb1     | carboxypeptidase<br>B1 (tissue)                    |
| ENSMUSG00000074268 | 29.831 | 0.002 | 0.030 | Amy2a5   | amylase 2a5                                        |
| ENSMUSG00000093931 | 30.457 | 0.001 | 0.028 | Amy2a3   | amylase 2a3                                        |
| ENSMUSG00000096569 | 30.457 | 0.001 | 0.028 | Amy2a2   | amylase 2a2                                        |
| ENSMUSG00000096770 | 30.457 | 0.001 | 0.028 | Amy2a4   | amylase 2a4                                        |
| ENSMUSG00000078087 | 30.601 | 0.000 | 0.000 | Rps1211  | ribosomal protein<br>S12-like 1                    |

---

**Table S5** Significant GO enrichment results for colonic transcriptome (Control group versus Model group).

| ID         | Term                              | Genes                                                                                                                                                                                            | adjust p value | Richfactor | z-score |
|------------|-----------------------------------|--------------------------------------------------------------------------------------------------------------------------------------------------------------------------------------------------|----------------|------------|---------|
| GO:0005840 | ribosome                          | Apod, Rps14, Rps18, Rpl18, Rps15, Rpl37a, Rpl36, Rps7, Rplp1, Rps5, Rpl19, Rps28, Rps16, Rps4x, Rps19, Rpl23, Rack1, Rpl36a, Rpl7, Rps10, Ppargc1a, Rps20, Rplp0, Rps11, Rps17, Rbm3, Rps3, Rps8 | 0.000          | 28/227     | 1.134   |
| GO:0005778 | peroxisomal membrane              | Abcd2, Mgst1, Cat, Pxmp4, Acs11, Pxmp2, Cav1                                                                                                                                                     | 0.005          | 7/45       | 1.134   |
| GO:0031903 | microbody membrane                | Abcd2, Mgst1, Cat, Pxmp4, Acs11, Pxmp2, Cav1                                                                                                                                                     | 0.005          | 7/45       | 1.134   |
| GO:0016324 | apical plasma membrane            | Scnn1a, Slc9a3, Atp1a1, Amotl1, Enpep, Scnn1b, Trf, Slc23a2, P2ry4, Myo1a, Cav1, Hsp90ab1, S100g, Slc26a3, Muc13, Slc26a2, Birc5, Cd44, Anxa6                                                    | 0.017          | 19/317     | 1.147   |
| GO:0045177 | apical part of cell               | Scnn1a, Slc9a3, Mgst1, Atp1a1, Pdzd2, Amotl1, Enpep, Scnn1b, Trf, Slc23a2, Iptr3, Ctst, P2ry4, Myo1a, Cav1, Hsp90ab1, S100g, Reep6, Slc26a3, Muc13, Slc26a2, Birc5, Cd44, Anxa6                  | 0.007          | 24/419     | 1.225   |
| GO:0034358 | plasma lipoprotein particle       | Pon1, Apoc1, Lpl, Msr1, Lsr                                                                                                                                                                      | 0.034          | 5/35       | 1.342   |
| GO:1990777 | lipoprotein particle              | Pon1, Apoc1, Lpl, Msr1, Lsr                                                                                                                                                                      | 0.034          | 5/35       | 1.342   |
| GO:0032994 | protein-lipid complex             | Pon1, Apoc1, Lpl, Msr1, Lsr                                                                                                                                                                      | 0.041          | 5/37       | 1.342   |
| GO:0044438 | microbody part                    | Abcd2, Hspd1, Mgst1, Cat, Pxmp4, Acs11, Pxmp2, Cav1                                                                                                                                              | 0.005          | 8/61       | 1.414   |
| GO:0044439 | peroxisomal part                  | Abcd2, Hspd1, Mgst1, Cat, Pxmp4, Acs11, Pxmp2, Cav1                                                                                                                                              | 0.005          | 8/61       | 1.414   |
| GO:0022625 | cytosolic large ribosomal subunit | Rpl18, Rpl37a, Rpl36, Rplp1, Rpl19, Rpl23, Rpl36a, Rpl7, Rplp0                                                                                                                                   | 0.001          | 9/61       | 1.667   |
| GO:0005777 | peroxisome                        | Abcd2, Idh1, Hspd1, Hsd12, Mgst1, Cat, Pxmp4, Vwa8, Ech1, Ephx2, Acs11, Hsd17b4, Pxmp2, Cav1, Syt7                                                                                               | 0.000          | 15/146     | 1.807   |

|                  |          |                                  |                                                                                                                                       |       |        |       |
|------------------|----------|----------------------------------|---------------------------------------------------------------------------------------------------------------------------------------|-------|--------|-------|
| GO:004257        | 9        | microbody                        | Abcd2, Idh1, Hspd1, Hsd12,<br>Mgst1, Cat, Pxmp4, Vwa8, Ech1,<br>Ephx2, Acsl1, Hsd17b4, Pxmp2,<br>Cav1, Syt7                           | 0.000 | 15/146 | 1.807 |
| GO:001593        | 4        | large<br>ribosomal<br>subunit    | Rpl18, Rpl37a, Rpl36, Rplp1,<br>Rpl19, Rpl23, Rpl36a, Rpl7,<br>Rplp0, Rbm3                                                            | 0.028 | 10/122 | 1.897 |
| <b>GO:000575</b> | <b>9</b> | <b>mitochondr<br/>ial matrix</b> | Hadha, Hspd1, Hadhb, Etfb,<br>Acadl, Mcl1, Ppif, Acadvl, Etfdh,<br>Pde2a, Cs, Mdh2, Dglucy, Mipep,<br>Acsm3, Trap1, Rps3, Hspe1, Etfb | 0.003 | 19/265 | 2.065 |

---

**Table S6** Significant GO enrichment results for colonic transcriptome (FOS group versus Model group).

| ID         | Term                                                   | Genes                                                                                                                                                                                                                                                                                                                                                                                                                                                                                                                                                                                                                                                                                                                                                                                                                                                     | adjust p value | Rich-factor | z-score |
|------------|--------------------------------------------------------|-----------------------------------------------------------------------------------------------------------------------------------------------------------------------------------------------------------------------------------------------------------------------------------------------------------------------------------------------------------------------------------------------------------------------------------------------------------------------------------------------------------------------------------------------------------------------------------------------------------------------------------------------------------------------------------------------------------------------------------------------------------------------------------------------------------------------------------------------------------|----------------|-------------|---------|
| GO:0000276 | mitochondrial proton-transporting ATP synthase complex | Atp5h, Atp5g1, Atp5l                                                                                                                                                                                                                                                                                                                                                                                                                                                                                                                                                                                                                                                                                                                                                                                                                                      | 0.039          | 3/11        | 1.732   |
| GO:0000313 | organellar ribosome                                    | Mrpl32, Mrpl42, Mrpl38, Mrpl58, Mrps15, Mrpl40, Mrps21, Mrps14, Mrps25, Mrps22, Mrps36, Nsun4, Mrps5, Mrpl39                                                                                                                                                                                                                                                                                                                                                                                                                                                                                                                                                                                                                                                                                                                                              | 0.000          | 14/93       | 2.673   |
| GO:0000314 | organellar small ribosomal subunit                     | Mrpl42, Mrps15, Mrps21, Mrps14, Mrps25, Mrps22, Mrps36, Mrps5                                                                                                                                                                                                                                                                                                                                                                                                                                                                                                                                                                                                                                                                                                                                                                                             | 0.000          | 8/31        | 2.121   |
| GO:0000315 | organellar large ribosomal subunit                     | Mrpl32, Mrpl42, Mrpl38, Mrpl58, Mrpl40, Nsun4, Mrpl39                                                                                                                                                                                                                                                                                                                                                                                                                                                                                                                                                                                                                                                                                                                                                                                                     | 0.031          | 7/60        | 1.890   |
| GO:0000502 | proteasome complex                                     | Psmb2, Psmb6, Psmc3, Psma3, Psme1, Psmc7, Psmc8, Psmd3, Psmd4, Psmd5, Psmd6, Psmd7, Psmd8, Psmd9, Psmd10, Psmd11, Psmd12, Psmd13, Psmd14, Psmd15, Psmd16, Psmd17, Psmd18, Psmd19, Psmd20, Psmd21, Psmd22, Psmd23, Psmd24, Psmd25, Psmd26, Psmd27, Psmd28, Psmd29, Psmd30, Psmd31, Psmd32, Psmd33, Psmd34, Psmd35, Psmd36, Psmd37, Psmd38, Psmd39, Psmd40, Psmd41, Psmd42, Psmd43, Psmd44, Psmd45, Psmd46, Psmd47, Psmd48, Psmd49, Psmd50, Psmd51, Psmd52, Psmd53, Psmd54, Psmd55, Psmd56, Psmd57, Psmd58, Psmd59, Psmd60, Psmd61, Psmd62, Psmd63, Psmd64, Psmd65, Psmd66, Psmd67, Psmd68, Psmd69, Psmd70, Psmd71, Psmd72, Psmd73, Psmd74, Psmd75, Psmd76, Psmd77, Psmd78, Psmd79, Psmd80, Psmd81, Psmd82, Psmd83, Psmd84, Psmd85, Psmd86, Psmd87, Psmd88, Psmd89, Psmd90, Psmd91, Psmd92, Psmd93, Psmd94, Psmd95, Psmd96, Psmd97, Psmd98, Psmd99, Psmd100 | 0.000          | 11/66       | 3.317   |
| GO:0000786 | nucleosome                                             | Hist2h3b, Hist2h4, Gylr1, Hist1h4k, Hist1h4d, Hist1h4h, Hist4h4, Hist2h3c2, Hist1h3e, Hist1h1e, Hist1h2ak, Hist1h1a, Hist1h2af, Hist1h3b, Hist1h1d, H2afz, Hist1h4i, Hist1h4b, Hist2h2ac, Hist2h3b, Hist2h4, Hist1h4k, Hist1h4d, Hist1h4h, Hist4h4, Hist2h3c2, Hist1h3e, Hist1h1e, Hist1h3b, Hist1h4i, Hist1h4b, Hist2h3b, Hist2h4, Hist1h4k, Hist1h4d, Smarcc2, Hist1h4h, Hist4h4, Hist2h3c2, Hist1h3e, Smarcc1, Rbbp4, Hist1h1e, Hist1h2ak, Ncor1, Sfr1, Hist1h1a, Rcc1, Hist1h2af, Hist1h3b, Hist1h1d, H2afz, Morf4l1, Smarcc1, Ss18, Smarca2, Hist1h4i, Zeb2, Ruvbl1, Hist1h4b, Hist2h2ac,                                                                                                                                                                                                                                                            | 0.000          | 19/88       | 3.900   |
| GO:0000788 | nuclear nucleosome                                     | Hist2h3c2, Hist1h3e, Hist1h1e, Hist1h3b, Hist1h4i, Hist1h4b, Hist2h3b, Hist2h4, Hist1h4k, Hist1h4d, Smarcc2, Hist1h4h, Hist4h4, Hist2h3c2, Hist1h3e, Smarcc1, Rbbp4, Hist1h1e, Hist1h2ak, Ncor1, Sfr1, Hist1h1a, Rcc1, Hist1h2af, Hist1h3b, Hist1h1d, H2afz, Morf4l1, Smarcc1, Ss18, Smarca2, Hist1h4i, Zeb2, Ruvbl1, Hist1h4b, Hist2h2ac,                                                                                                                                                                                                                                                                                                                                                                                                                                                                                                                | 0.000          | 12/38       | 3.464   |
| GO:0000790 | nuclear chromatin                                      | Hist1h2ak, Ncor1, Sfr1, Hist1h1a, Rcc1, Hist1h2af, Hist1h3b, Hist1h1d, H2afz, Morf4l1, Smarcc1, Ss18, Smarca2, Hist1h4i, Zeb2, Ruvbl1, Hist1h4b, Hist2h2ac,                                                                                                                                                                                                                                                                                                                                                                                                                                                                                                                                                                                                                                                                                               | 0.000          | 31/402      | 4.131   |

|          |                               |  |                              |       |       |       |
|----------|-------------------------------|--|------------------------------|-------|-------|-------|
|          |                               |  | Hey2                         |       |       |       |
|          |                               |  | Ybx1, Sf3b2, Ik, Sart1,      |       |       |       |
|          |                               |  | Cwc15, Zmat2, Snrnp70,       |       |       |       |
|          |                               |  | Prpf6, Rbm8a, Wac, Slu7,     |       |       |       |
| GO:00056 | spliceosomal complex          |  | Snw1, Aqr, Hnrnpc, Rbm17,    | 0.000 | 22/19 | 4.690 |
| 81       |                               |  | Hspa8, Prpf31, BC005624,     |       | 1     |       |
|          |                               |  | Lsm3, Snrpd1, Hnrnrm,        |       |       |       |
|          |                               |  | Mfap1a                       |       |       |       |
|          |                               |  | Sf3b2, Ik, Sart1, Cwc15,     |       |       |       |
| GO:00056 | U2-type spliceosomal          |  | Zmat2, Prpf6, Rbm8a, Snw1,   | 0.000 | 13/86 | 3.606 |
| 84       | complex                       |  | Aqr, Prpf31, Lsm3, Snrpd1,   |       |       |       |
|          |                               |  | Mfap1a                       |       |       |       |
|          |                               |  | Ndufa12, Atp5h, Chchd10,     |       |       |       |
|          |                               |  | Slc25a3, Cox6b1, Pet100,     |       |       |       |
|          |                               |  | Atp5mpl, COX1, Ndufv3,       |       |       |       |
|          |                               |  | Ndufa5, Ndufa2, Cox5b,       |       |       |       |
|          |                               |  | Rdh13, Ndufb10, Atp5g1,      |       |       |       |
| GO:00057 | mitochondrial inner           |  | Atp5e, ND2, Mrps21, Cox5a,   | 0.000 | 36/44 | 1.667 |
| 43       | membrane                      |  | Slc25a15, Ndufa8, Timm23,    |       | 7     |       |
|          |                               |  | Hspd1, Uqcrfs1, Slc8b1,      |       |       |       |
|          |                               |  | Ndufs6, Ndufa13, Pmpcb,      |       |       |       |
|          |                               |  | Cox11, Cyb5r3, Afg3l2, Polg, |       |       |       |
|          |                               |  | Higd2a, Mgst1, Atp5l,        |       |       |       |
|          |                               |  | Ndufs8                       |       |       |       |
|          |                               |  | Ndufa12, COX1, Ndufv3,       |       |       |       |
| GO:00057 | mitochondrial respiratory     |  | Ndufa5, Ndufa2, Ndufb10,     | 0.000 | 13/80 | 1.387 |
| 46       | chain                         |  | ND2, Cox5a, Ndufa8,          |       |       |       |
|          |                               |  | Uqcrfs1, Ndufs6, Ndufa13,    |       |       |       |
|          |                               |  | Ndufs8                       |       |       |       |
|          |                               |  | Ndufa12, Ndufv3, Ndufa5,     |       |       |       |
| GO:00057 | mitochondrial respiratory     |  | Ndufa2, Ndufb10, ND2,        | 0.000 | 10/51 | 1.897 |
| 47       | chain complex I               |  | Ndufa8, Ndufs6, Ndufa13,     |       |       |       |
|          |                               |  | Ndufs8                       |       |       |       |
|          |                               |  | Mrpl32, Mrpl42, Mrpl38,      |       |       |       |
|          |                               |  | Pin4, Mrpl58, Mrps15,        |       |       |       |
| GO:0005  | <b>mitochondrial matrix</b>   |  | Mrpl40, Hspe1, Mrps21,       | 0.001 | 23/26 | 2.711 |
| 759      |                               |  | Mrps14, Mrps25, Mars2,       |       | 5     |       |
|          |                               |  | Nfs1, Pitrm1, Hspd1, Mrps22, |       |       |       |
|          |                               |  | Mrps36, Pmpcb, Nsun4,        |       |       |       |
|          |                               |  | Mrps5, Polg, Lactb2, Mrpl39  |       |       |       |
|          |                               |  | Mrpl32, Mrpl42, Mrpl38,      |       |       |       |
| GO:0005  | <b>mitochondrial ribosome</b> |  | Mrpl58, Mrps15, Mrpl40,      | 0.000 | 14/93 | 2.673 |
| 761      |                               |  | Mrps21, Mrps14, Mrps25,      |       |       |       |
|          |                               |  | Mrps22, Mrps36, Nsun4,       |       |       |       |

|                   |                                              |                                                                                                                                                                                                                                                                                                                                      |       |            |       |
|-------------------|----------------------------------------------|--------------------------------------------------------------------------------------------------------------------------------------------------------------------------------------------------------------------------------------------------------------------------------------------------------------------------------------|-------|------------|-------|
| GO:0005762        | mitochondrial large ribosomal subunit        | Mrps5, Mrpl39<br>Mrpl32, Mrpl42, Mrpl38,<br>Mrpl58, Mrpl40, Nsun4,<br>Mrpl39                                                                                                                                                                                                                                                         | 0.031 | 7/60       | 1.890 |
| <b>GO:0005763</b> | <b>mitochondrial small ribosomal subunit</b> | Mrpl42, Mrps15, Mrps21,<br>Mrps14, Mrps25, Mrps22,<br>Mrps36, Mrps5                                                                                                                                                                                                                                                                  | 0.000 | 8/31       | 2.121 |
| GO:0005840        | ribosome                                     | Rps7, Rps26, Rpl13, Rps19,<br>Rps16, Rpl35, Fau, Mrpl32,<br>Rps18, Rpl7a, Eif3h, Rpl37,<br>Rps15a, Rps20, Rack1,<br>Mrpl42, Apod, Rplp0,<br>Mrpl38, Rpl14, Rpl17,<br>Mrpl58, Mrps15, Mrpl40,<br>Rps4x, Mrps21, Mrps14,<br>Mrps25, Rpl9, Rpl2211,<br>Mrps22, Mrps36,<br>Gadd45gip1, Nsun4, Mrps5,<br>Uba52, Rpl37rt, Rps24,<br>Mrpl39 | 0.000 | 39/22<br>7 | 1.121 |
| GO:0005844        | polysome                                     | Rps26, Rpl7a, Eif3h, Rpl17,<br>Fus, Rps4x, Calr, Naa38                                                                                                                                                                                                                                                                               | 0.030 | 8/75       | 1.414 |
| GO:0008023        | transcription elongation factor complex      | Paf1, Rtf1, Snw1, Elp1, Ctr9,<br>Eaf1, Leo1                                                                                                                                                                                                                                                                                          | 0.019 | 7/53       | 1.134 |
| GO:0015629        | actin cytoskeleton                           | Myl6, Tpm3, Ppp1r12a,<br>Myzap, Tax1bp3, Myl12b,<br>Ctnna1, Cnn3, Cfl2, Myh11,<br>Arhgef2, Snx9, Hnrnpc,<br>Tpm1, Gabarap, Cap1, Actr2,<br>Crk, Abl2, Cfl1, Kansl2,<br>Arpc2, Arpc1a, Lmod1,<br>Calb2, Dctn5, Sptbn1,<br>Epb4112, Filip1, Ndc1,<br>Arpc1b, Afap1                                                                     | 0.004 | 32/49<br>2 | 2.121 |
| GO:0015934        | large ribosomal subunit                      | Rpl13, Rpl35, Mrpl32, Rpl7a,<br>Rpl37, Mrpl42, Rplp0,<br>Mrpl38, Rpl14, Rpl17,<br>Mrpl58, Mrpl40, Rpl9,<br>Rpl2211, Nsun4, Uba52,<br>Mrpl39                                                                                                                                                                                          | 0.000 | 17/12<br>2 | 1.213 |
| GO:0016363        | nuclear matrix                               | Nono, Csnk2b, Anp32a,<br>Dgkq, Snw1, Chmp1a,<br>Smc1a, Hnrnpm, Ruvb11                                                                                                                                                                                                                                                                | 0.028 | 9/90       | 1.667 |
| GO:00165          | SWI/SNF complex                              | Smarcc2, Smarce1, Smarcc1,                                                                                                                                                                                                                                                                                                           | 0.003 | 5/17       | 2.236 |

|            |                                         |                                                                                                                                                                                                                                                                                |       |            |        |
|------------|-----------------------------------------|--------------------------------------------------------------------------------------------------------------------------------------------------------------------------------------------------------------------------------------------------------------------------------|-------|------------|--------|
| 14         |                                         | Ss18, Smarca2                                                                                                                                                                                                                                                                  |       |            |        |
| GO:0016607 | nuclear speck                           | Sf3b2, Glycer1, Ikbip1, Sart1, Cwc15, Snrnp70, Rbm10, Prpf6, Rbm8a, Pqbp1, Dgkq, Scnm1, Slu7, Snw1, Zc3h13, Morf4l1, Sgk1, Prpf31, Nampt, Hif3a, Foxo4 Ndufa12, Atp5h, Chchd10, Slc25a3, Cox6b1, Pet100, Atp5mpl, COX1, Ndufv3, Ndufa5, Ndufa2, Cox5b, Rdh13, Ndufb10, Atp5g1, | 0.028 | 21/32<br>2 | 2.400  |
| GO:0019866 | organelle inner membrane                | Atp5e, ND2, Mrps21, Cox5a, Slc25a15, Ndufa8, Timm23, Hspd1, Uqcrrf1, Slc8b1, Ndufs6, Ndufa13, Pmpcb, Cox11, Cyb5r3, Afg3l2, Polg, Higd2a, Mgst1, Atp5l, Ndufs8                                                                                                                 | 0.000 | 36/49<br>0 | 1.667  |
| GO:0022624 | proteasome accessory complex            | Psmc8, Psme3, Psmc3, Psme1, Psmc7 Rps7, Rps26, Rpl13, Rps19, Rps16, Rpl35, Fau, Rps18,                                                                                                                                                                                         | 0.013 | 5/25       | 2.236  |
| GO:0022626 | cytosolic ribosome                      | Rpl7a, Rpl37, Rps15a, Rps20, Rack1, Apod, Rplp0, Rpl14, Rpl17, Rps4x, Rpl9, Rpl22l1, Uba52, Rps24                                                                                                                                                                              | 0.000 | 22/10<br>9 | -1.279 |
| GO:0022627 | cytosolic small ribosomal subunit       | Rps7, Rps26, Rps19, Rps16, Fau, Rps18, Rps15a, Rps20, Rack1, Rps4x, Uba52, Rps24                                                                                                                                                                                               | 0.000 | 12/44      | -1.155 |
| GO:0030532 | small nuclear ribonucleoprotein complex | Sf3b2, Sart1, Zmat2, Snrnp70, Nolc1, Prpf6, Slu7, Prpf31, Lsm3, Snrpd1                                                                                                                                                                                                         | 0.001 | 10/64      | 3.162  |
| GO:0030964 | NADH dehydrogenase complex              | Ndufa12, Ndufv3, Ndufa5, Ndufa2, Ndufb10, ND2, Ndufa8, Ndufs6, Ndufa13, Ndufs8                                                                                                                                                                                                 | 0.000 | 10/51      | 1.897  |
| GO:0031012 | extracellular matrix                    | Efemp1, Igfbp7, S100a11, Dpt, Sparcl1, Col6a5, Pkm, Lrig2, Itgb4, Vcan, Htra1, Ccdc80, Hsp90aa1, Col14a1, Col12a1, Postn, Lamb3, Ecm1, Calr, Bgn, Lgals1, Optc, Gsto1, Cfdp1, Hnrnpm,                                                                                          | 0.028 | 28/47<br>6 | 4.158  |

|                |                                         |                                                                                                                                                                                                                  |       |            |        |
|----------------|-----------------------------------------|------------------------------------------------------------------------------------------------------------------------------------------------------------------------------------------------------------------|-------|------------|--------|
| GO:00314<br>61 | cullin-RING ubiquitin<br>ligase complex | Cela2a, Mfap1a, Dag1<br>Fbx117, Anapc13, Gan,<br>Dcaf10, Glmn, Anapc10,<br>Fbx15, Fbx120, Kctd10,<br>Cacybp, Cul4a, Ube2s,<br>Skp1a, Vhl                                                                         | 0.012 | 14/16<br>0 | -1.604 |
| GO:00319<br>70 | organelle envelope lumen                | Chchd2, Chchd10, Prelid1,<br>Cycs, Ndufa8, Timm23,<br>Coa4, Cacybp, Fam3b<br>Hist2h3b, Hist2h4, Glyr1,<br>Hist1h4k, Hist1h4d,<br>Hist1h4h, Hist4h4,                                                              | 0.028 | 9/90       | 2.333  |
| GO:00329<br>93 | protein-DNA complex                     | Hist2h3c2, Hist1h3e,<br>Hist1h1e, Hist1h2ak, Kdm5a,<br>Hist1h1a, Hist1h2af,<br>Hist1h3b, Hist1h1d, H2afz,<br>Hist1h4i, Hist1h4b, Hist2h2ac                                                                       | 0.000 | 20/19<br>1 | 3.578  |
| GO:00343<br>99 | nuclear periphery                       | Nono, Csnk2b, Anp32a,<br>Tnpo2, Dgkq, Snw1,<br>Chmp1a, Smc1a, Hnrnpm,<br>Ruvb1, Dag1<br>Atp5h, Calm3, Pitpna,<br>Slc25a3, Gapdh, Stip1, Cycs,                                                                    | 0.025 | 11/12<br>1 | 1.508  |
| GO:00432<br>09 | myelin sheath                           | Pkm, Cox5b, Hsp90aa1,<br>Cox5a, Hspd1, Hspa8,<br>Uqcrfs1, Uba52, Gsto1, Rala,<br>Gnb2, Prkci, Tuba1a<br>Ndufa12, Atp5h, Chchd10,<br>Slc25a3, Pet100, Atp5mpl,<br>COX1, Bak1, Ndufv3,<br>Ndufa5, Ndufa2, Ndufb10, | 0.001 | 20/21<br>9 | 2.683  |
| GO:00444<br>55 | mitochondrial membrane<br>part          | Atp5g1, Atp5e, ND2, Cox5a,<br>Ndufa8, Timm23, Hspd1,<br>Uqcrfs1, Slc8b1, Ndufs6,<br>Cisd1, Ndufa13, Cox11,<br>Afg3l2, Atp5l, Ndufs8<br>Hist2h3b, Hist2h4, Glyr1,<br>Hist1h4k, Hist1h4d,<br>Hist1h4h, Hist4h4,    | 0.000 | 28/22<br>1 | 1.134  |
| GO:00448<br>15 | DNA packaging complex                   | Hist2h3c2, Hist1h3e,<br>Hist1h1e, Hist1h2ak,<br>Hist1h1a, Hist1h2af,<br>Hist1h3b, Hist1h1d, H2afz,<br>Hist1h4i, Hist1h4b, Hist2h2ac                                                                              | 0.000 | 19/96      | 3.900  |



|                        |                                             |                                                                                                                                                                                                                                            |       |            |        |
|------------------------|---------------------------------------------|--------------------------------------------------------------------------------------------------------------------------------------------------------------------------------------------------------------------------------------------|-------|------------|--------|
| GO:00452<br>71         | respiratory chain complex I                 | Ndufa12, Ndufv3, Ndufa5,<br>Ndufa2, Ndufb10, ND2,<br>Ndufa8, Ndufs6, Ndufa13,<br>Ndufs8                                                                                                                                                    | 0.000 | 10/51      | 1.897  |
| GO:00465<br>40         | U4/U6 x U5 tri-snRNP<br>complex             | Sart1, Zmat2, Prpf6, Prpf31,<br>Lsm3, Snrpd1<br>Efemp1, Igfbp7, S100a11,<br>Dpt, Sparcl1, Col6a5, Pkm,<br>Itgb4, Vcan, Htra1, Ccdc80,                                                                                                      | 0.008 | 6/33       | 2.449  |
| GO:00620<br>23         | collagen-containing<br>extracellular matrix | Hsp90aa1, Col14a1, Col12a1,<br>Postn, Lamb3, Ecm1, Calr,<br>Bgn, Lgals1, Gsto1, Cfdp1,<br>Hnrnpm, Cela2a, Dag1<br>Ndufa12, Cox6b1, COX1,<br>Ndufv3, Ndufa5, Ndufa2,<br>Ndufb10, ND2, Cox5a,<br>Ndufa8, Uqcrfs1, Ndufs6,<br>Ndufa13, Ndufs8 | 0.007 | 25/36<br>0 | 4.200  |
| GO:00704<br>69         | respiratory chain                           | Ndufb10, ND2, Cox5a,<br>Ndufa8, Uqcrfs1, Ndufs6,<br>Ndufa13, Ndufs8                                                                                                                                                                        | 0.000 | 14/92      | 1.604  |
| GO:00710<br>05         | U2-type precatalytic<br>spliceosome         | Sf3b2, Ik, Sart1, Zmat2,<br>Prpf6, Prpf31, Lsm3, Snrpd1,<br>Mfap1a                                                                                                                                                                         | 0.000 | 9/47       | 3.000  |
| GO:00710<br>11         | precatalytic spliceosome                    | Sf3b2, Ik, Sart1, Zmat2,<br>Prpf6, Prpf31, Lsm3, Snrpd1,<br>Mfap1a                                                                                                                                                                         | 0.000 | 9/48       | 3.000  |
| GO:00710<br>13         | catalytic step 2 spliceosome                | Sf3b2, Sart1, Cwc15, Prpf6,<br>Rbm8a, Slu7, Snw1, Aqr,<br>Hnrnpc, Lsm3, Snrpd1,<br>Hnrnpm                                                                                                                                                  | 0.000 | 12/82      | 3.464  |
| GO:00715<br>64         | npBAF complex                               | Smarcc2, Smarce1, Smarcc1,<br>Ss18, Smarca2                                                                                                                                                                                                | 0.000 | 5/12       | 2.236  |
| GO:00715<br>65         | nBAF complex                                | Smarcc2, Smarce1, Smarcc1,<br>Smarca2                                                                                                                                                                                                      | 0.013 | 4/15       | 2.000  |
| GO:00975<br>25         | spliceosomal snRNP<br>complex               | Sf3b2, Sart1, Zmat2,<br>Snrnp70, Prpf6, Prpf31,<br>Lsm3, Snrpd1                                                                                                                                                                            | 0.009 | 8/59       | 2.828  |
| GO:00975<br>26         | spliceosomal tri-snRNP<br>complex           | Sart1, Zmat2, Prpf6, Prpf31,<br>Lsm3, Snrpd1                                                                                                                                                                                               | 0.008 | 6/33       | 2.449  |
| GO:00985<br>62         | cytoplasmic side of<br>membrane             | Esyt2, Cdip1, Rhoa, Myzap,<br>Gnas, Map2k2, Gnai3, Fgfr3,<br>Snx9, Pkp4, Chmp4b, Cisd1,<br>Cyth1, Gnb2                                                                                                                                     | 0.028 | 14/18<br>1 | -1.069 |
| <b>GO:0098<br/>798</b> | <b>mitochondrial protein<br/>complex</b>    | Ndufa12, Atp5h, Chchd10,<br>Mrpl32, Atp5mpl, COX1,<br>Ndufv3, Mrpl42, Ndufa5,                                                                                                                                                              | 0.000 | 37/26<br>8 | 2.795  |



**Table S7** Gene sets significantly enriched in mice under stress (FDR q-value < 0.05). (a) Gene sets that were upregulated in Control group, and (b) gene sets that were upregulated in Model group. SIZE is number of genes belonging the gene set. NES is normalized enrichment score

|     | NAME                                                       | SIZE | NES    | FDR q-value |
|-----|------------------------------------------------------------|------|--------|-------------|
| (a) |                                                            |      |        |             |
|     | GNF2_MKI67                                                 | 23   | 3.097  | 0.000       |
|     | <b>GNF2_ESPL1</b>                                          | 30   | 3.087  | 0.000       |
|     | <b>GNF2_CCNB2</b>                                          | 41   | 3.068  | 0.000       |
|     | KEGG_PPAR_SIGNALING_PATHWAY                                | 53   | 3.025  | 0.000       |
|     | GO_TRIGLYCERIDE_CATABOLIC_PROCESS                          | 24   | 2.830  | 0.000       |
|     | GNF2_SMC2L1                                                | 26   | 2.745  | 0.000       |
|     | CROONQUIST_NRAS_SIGNALING_DN                               | 55   | 2.529  | 0.000       |
|     | REACTOME_EXTENSION_OF_TELOMERES                            | 34   | 2.568  | 0.000       |
|     | <b>GNF2_CCNA2</b>                                          | 49   | 2.626  | 0.000       |
|     | <b>GNF2_CENPE</b>                                          | 31   | 2.674  | 0.000       |
|     | <b>GNF2_CDC20</b>                                          | 43   | 2.491  | 0.001       |
|     | KANG_DOXORUBICIN_RESISTANCE_UP                             | 40   | 2.447  | 0.001       |
|     | GNF2_RRM2                                                  | 31   | 2.459  | 0.001       |
|     | <b>GNF2_CENPF</b>                                          | 41   | 2.398  | 0.001       |
|     | GNF2_HMMR                                                  | 38   | 2.401  | 0.001       |
|     | GO_NEUTRAL_LIPID_METABOLIC_PROCESS                         | 79   | 2.383  | 0.002       |
|     | REACTOME_DNA_STRAND_ELONGATION                             | 28   | 2.337  | 0.002       |
|     | REACTOME_TELOMERE_MAINTENANCE                              | 34   | 2.285  | 0.003       |
|     | GO_CHEMOKINE_ACTIVITY                                      | 24   | 2.225  | 0.004       |
|     | GNF2_RFC3                                                  | 30   | 2.240  | 0.004       |
| (b) |                                                            |      |        |             |
|     | REACTOME_EUKARYOTIC_TRANSLATION_ELONGATION                 | 32   | -2.609 | 0.000       |
|     | KEGG_RIBOSOME                                              | 30   | -2.500 | 0.000       |
|     | GO_CYTOSOLIC_RIBOSOME                                      | 41   | -2.445 | 0.000       |
|     | REACTOME_RESPONSE_OF_EIF2AK4_GCN2_TO_AMINO_ACID_DEFICIENCY | 37   | -2.433 | 0.000       |

|                                                  |    |        |       |
|--------------------------------------------------|----|--------|-------|
| BILANGES_SERUM_AND_RAPAMYCIN_SENSITIVE_GENES     | 35 | -2.392 | 0.000 |
| GO_CYTOSOLIC_SMALL_RIBOSOMAL_SUBUNIT             | 22 | -2.340 | 0.000 |
| GCM_TPT1                                         | 22 | -2.316 | 0.000 |
| REACTOME_NONSENSE_MEDIATED_DECAY_NMD             | 46 | -2.227 | 0.000 |
| REACTOME_SELENOAMINO_ACID_METABOLISM             | 47 | -2.228 | 0.000 |
| GO_COTRANSLATIONAL_PROTEIN_TARGETING_TO_MEMBRANE | 42 | -2.212 | 0.000 |

---
